# Supplementary material for: A chiral co-crystalline form of poly(2,6-dimethyl-1,4-phenylene)oxide (PPO)
Source: Royal Society of Chemistry journal article supplement (doi:10.1039/c2jm30907f), 2012-01-01
Supplement: c2jm30907f.pdf [file c2jm30907f.pdf]

## Supporting Information of the manuscript

# A Chiral Co-Crystalline Form of Poly(2,6-dimethyl-1,4-phenylene)oxide (PPO)

*Oreste Tarallo,<sup>a\*</sup> Vittorio Petraccone,<sup>a</sup>*

<sup>a</sup>Dipartimento di Chimica “Paolo Corradini”, Università degli Studi di Napoli Federico II,  
Complesso di Monte S. Angelo, via Cintia, 80126 Napoli, Italy

*Christophe Daniel,<sup>b</sup> Gianluca Fasano,<sup>b</sup> Paola Rizzo,<sup>b</sup> Gaetano Guerra<sup>b\*</sup>*

<sup>b</sup>Dipartimento di Chimica e Biologia and INSTM Research Unit, Università degli Studi di Salerno  
via Ponte Don Melillo, 84084 Fisciano (SA), Italy

[oreste.tarallo@unina.it](mailto:oreste.tarallo@unina.it); [vittorio.petraccone@unina.it](mailto:vittorio.petraccone@unina.it); [cdaniel@unisa.it](mailto:cdaniel@unisa.it); [prizzo@unisa.it](mailto:prizzo@unisa.it);  
[gguerra@unisa.it](mailto:gguerra@unisa.it)

**Table S1.** Diffraction angles ( $2\theta_{obsd}$ ) and Bragg distances ( $d_{obsd}$ ) of the reflections observed in the X-ray powder diffraction patterns of Figures 3B, C, D and E. The patterns correspond to co-crystalline phases of PPO with racemic (Columns A and B) or non-racemic (Columns C and D)  $\alpha$ -pinene molecules. The  $hkl$  indices, attributed according the tetragonal unit cell ( $a=1.19$  nm,  $c=1.71$ nm) proposed in ref.9c have been also reported.

|           | A                              |                           | B                              |                           | C                                           |                           | D                                           |                           |                    |
|-----------|--------------------------------|---------------------------|--------------------------------|---------------------------|---------------------------------------------|---------------------------|---------------------------------------------|---------------------------|--------------------|
|           | PPO/racemic guest <sup>1</sup> |                           | PPO/racemic guest <sup>2</sup> |                           | PPO/(1S)-(-)- $\alpha$ -pinene <sup>3</sup> |                           | PPO/(1R)-(+)- $\alpha$ -pinene <sup>4</sup> |                           |                    |
|           | $hkl$                          | $2\theta_{obsd}$<br>(deg) | $d_{obsd}$<br>(nm)             | $2\theta_{obsd}$<br>(deg) | $d_{obsd}$<br>(nm)                          | $2\theta_{obsd}$<br>(deg) | $d_{obsd}$<br>(nm)                          | $2\theta_{obsd}$<br>(deg) | $d_{obsd}$<br>(nm) |
| *         |                                |                           |                                | 7.3                       | 1.219                                       |                           |                                             | 7.4                       | 1.203              |
| <b>1</b>  | 101                            | 9.0                       | 0.983                          | 9.1                       | 0.969                                       | 9.2                       | 0.966                                       | 9.2                       | 0.962              |
| <b>2</b>  | 110                            | 10.4                      | 0.851                          | 10.6                      | 0.839                                       | 10.7                      | 0.828                                       | 10.7                      | 0.827              |
| <b>3</b>  | 111                            | 11.8                      | 0.750                          |                           |                                             |                           |                                             | 11.8                      | 0.749              |
| <b>4</b>  | 102                            | 12.8                      | 0.692                          | 12.9                      | 0.685                                       | 13.1                      | 0.678                                       | 13.1                      | 0.676              |
| <b>5</b>  | 200                            | 14.8                      | 0.599                          | 15.0                      | 0.592                                       | 15.0                      | 0.590                                       | 15.1                      | 0.587              |
| <b>6</b>  | 201                            | 15.8                      | 0.562                          | 15.8                      | 0.560                                       | 15.9                      | 0.558                                       | 15.9                      | 0.558              |
| <b>7</b>  | 210                            | 16.7                      | 0.531                          |                           |                                             |                           |                                             |                           |                    |
| <b>8</b>  | 211                            | 17.4                      | 0.510                          | 17.5                      | 0.506                                       | 17.5                      | 0.506                                       | 17.6                      | 0.503              |
| <b>9</b>  | 212                            | 19.6                      | 0.453                          | 19.7                      | 0.450                                       | 19.6                      | 0.454                                       | 19.8                      | 0.449              |
| <b>10</b> | 220                            | 21.2                      | 0.420                          | 21.4                      | 0.415                                       | 21.6                      | 0.412                                       | 21.3                      | 0.417              |
| <b>11</b> | 221                            | 21.7                      | 0.410                          | 21.8                      | 0.408                                       |                           |                                             | 21.9                      | 0.406              |
| <b>12</b> | 301                            | 23.0                      | 0.387                          | 23.0                      | 0.387                                       | 23.2                      | 0.383                                       | 23.5                      | 0.378              |
| <b>13</b> |                                |                           |                                | 27.3                      | 0.326                                       | 27.2                      | 0.328                                       | 27.3                      | 0.327              |

<sup>1</sup> Figure 3-E, clathrate form with non racemic guest (data from Ref. 9C).

<sup>2</sup> Figure 3-D, clathrate form with non racemic guest (our data).

<sup>3</sup> Figure 3-B, clathrate form with (1S)-(-)- $\alpha$ -pinene (our data).

<sup>4</sup> Figure 3-C, clathrate form with (1R)-(+)- $\alpha$ -pinene (our data).

\* Reflection attributable to some minor amount of PPO nanoporous form (see Ref. 4f)

**Table S2.** Fractional coordinates of the atoms of the asymmetric unit of the co-crystalline form of PPO with (1*S*)-(-)- $\alpha$ -pinene according the model reported in Figure 4 (cell constants  $a = b = 1.19$  nm,  $c = 1.71$  nm; space group  $P4_3$ ). The fractional coordinates of the atoms of the guest are reported in italics. Hydrogen atoms were included in the structure factors calculation, but they are omitted in this table for simplicity.

|          | $x/a$         | $y/b$        | $z/c$        |
|----------|---------------|--------------|--------------|
| C1       | 0,159         | 0,028        | 0,098        |
| C2       | 0,199         | 0,052        | 0,173        |
| C3       | 0,179         | -0,018       | 0,236        |
| C4       | 0,114         | -0,114       | 0,226        |
| C5       | 0,071         | -0,139       | 0,152        |
| C6       | 0,094         | -0,069       | 0,089        |
| O1       | 0,098         | -0,190       | 0,286        |
| C7       | 0,231         | 0,010        | 0,315        |
| C8       | 0,002         | -0,243       | 0,138        |
| C1b      | -0,477        | 0,658        | 0,579        |
| C2b      | -0,455        | 0,701        | 0,505        |
| C3b      | -0,523        | 0,679        | 0,441        |
| C4b      | -0,617        | 0,609        | 0,451        |
| C5b      | -0,638        | 0,562        | 0,525        |
| C6b      | -0,570        | 0,587        | 0,587        |
| O1       | -0,692        | 0,591        | 0,391        |
| C7b      | -0,498        | 0,731        | 0,363        |
| C8b      | -0,739        | 0,487        | 0,537        |
| <i>C</i> | <i>0,001</i>  | <i>0,342</i> | <i>0,357</i> |
| <i>C</i> | <i>-0,073</i> | <i>0,266</i> | <i>0,382</i> |
| <i>C</i> | <i>-0,184</i> | <i>0,305</i> | <i>0,418</i> |
| <i>C</i> | <i>-0,187</i> | <i>0,432</i> | <i>0,417</i> |
| <i>C</i> | <i>-0,076</i> | <i>0,479</i> | <i>0,451</i> |
| <i>C</i> | <i>-0,030</i> | <i>0,467</i> | <i>0,367</i> |
| <i>C</i> | <i>0,112</i>  | <i>0,314</i> | <i>0,319</i> |
| <i>C</i> | <i>-0,150</i> | <i>0,484</i> | <i>0,338</i> |
| <i>C</i> | <i>-0,186</i> | <i>0,431</i> | <i>0,259</i> |

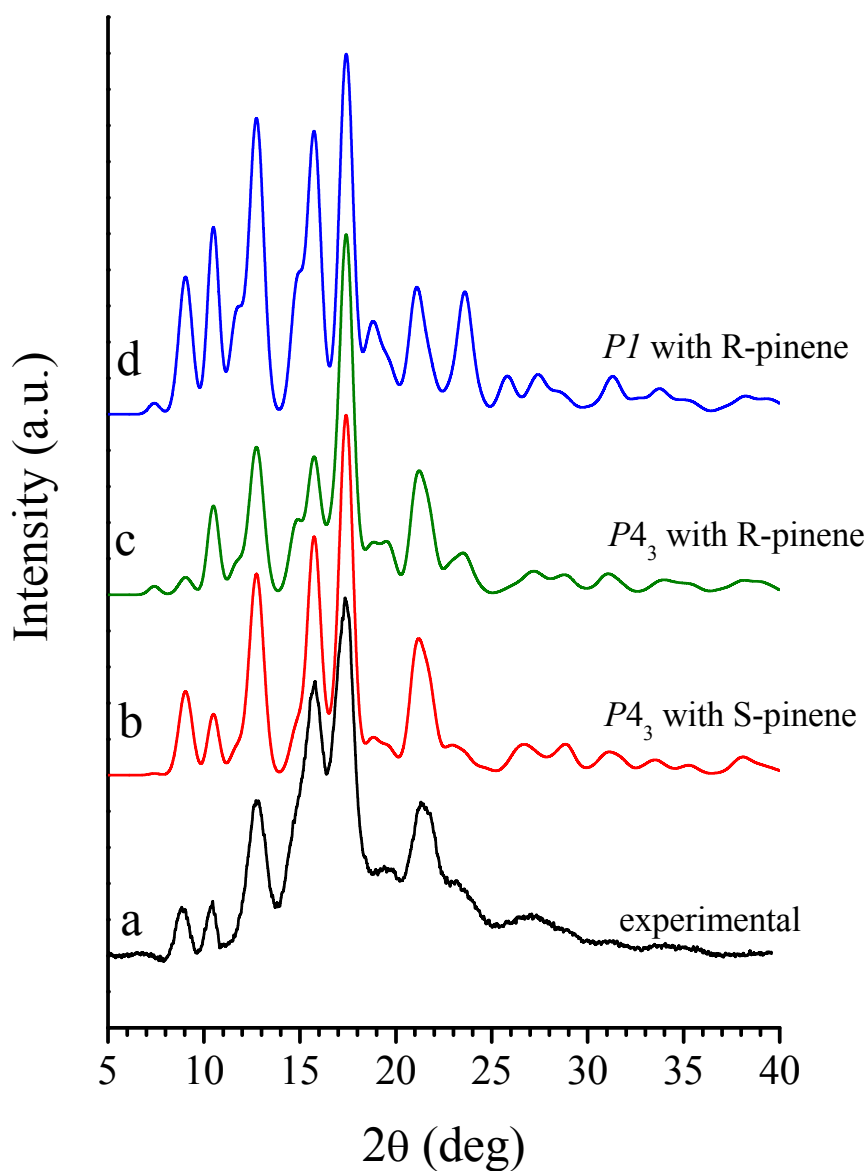

**FIGURE S1.** Comparison between the experimental X-ray powder diffraction pattern (black line) of the co-crystalline form of PPO with (1*S*)-(-)- $\alpha$ -pinene, after subtraction of the amorphous and background halos, with the calculated ones according to (b) the structural model proposed in Figure 5 of the text (space group  $P4_3$ , S guests), (c) a structural model in the space group  $P4_3$  containing only R guests, (d) a structural model in the space group  $P1$  (with antichiral helices) and containing only R guests.

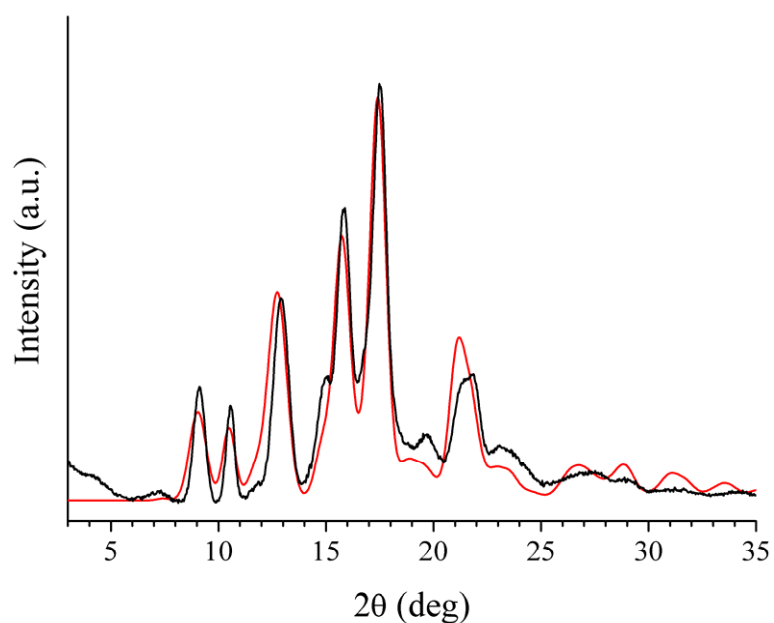

**Figure S2.** Comparison between the experimental X-ray powder diffraction pattern (black solid line) of the co-crystalline form of PPO with racemic  $\alpha$ -pinene after subtraction of the amorphous and background halos (see Figure 3) with the calculated one (red solid line) according to the structural model proposed in the text in the likely hypothesis that it is constituted by a mixture of chiral crystals including only R and L polymer helices and (1*R*)-(+)- $\alpha$ -pinene and (1*S*)-(–)- $\alpha$ -pinene enantiomers, respectively.
